# Supplementary material for: Outcome Evaluation of the National Cancer Institute Career Development Awards Program
Source: Springer Nature journal article supplement (doi:10.1007/s13187-012-0444-y), 2013-01-04
Supplement: MOESM1 [file 9246240]

**Online Resource 1. K mechanism descriptions.**

| <b>Mechanism</b> | <b>Objectives</b>                                                                                                                                                                                             | <b>Research Discipline</b>                                     | <b>Support Years</b>                    | <b>Qualifying Degrees</b>                       | <b>Career Stage</b>                                                                        |
|------------------|---------------------------------------------------------------------------------------------------------------------------------------------------------------------------------------------------------------|----------------------------------------------------------------|-----------------------------------------|-------------------------------------------------|--------------------------------------------------------------------------------------------|
| K01              | Bridged the transition from mentored research environment to an independent research career in cancer research                                                                                                | Basic sciences                                                 | Up to 5 years                           | Research or health professional doctoral degree | Early career                                                                               |
| K07              | Provides support for early career investigators to conduct research in cancer prevention, control, behavioral and population sciences research                                                                | Cancer prevention, control, behavioral and population sciences | Up to 5 years                           | Research or health professional doctoral degree | Postdoctoral fellows, non-tenured early career stage faculty                               |
| K08              | Supports individuals with a clinical doctoral degree to receive mentored training in laboratory-based cancer research                                                                                         | Basic sciences, translational research                         | Up to 5 years                           | MD or equivalent, PhD in clinical discipline    | Postdoctoral and clinical fellows, non-tenured early career faculty with a clinical degree |
| K11              | Provided basic, clinical, or behavioral research training to MDs; Phase I provided didactic study and laboratory experiences while Phase II allowed recipients to pursue an intensive cancer research project | Basic, behavioral, or clinical research                        | Phase I, 2-3 years; Phase II, 2-3 years | MD or equivalent                                | Early career                                                                               |
| K22              | Provides “protected time” for newly independent investigators to develop and receive support for their initial cancer research programs                                                                       | All cancer research*                                           | Up to 3 years                           | Research or health professional doctoral degree | Postdoctoral and clinical fellows                                                          |

| <b>Mechanism</b> | <b>Objectives</b>                                                                                                                                                | <b>Research Discipline</b>                  | <b>Support Years</b> | <b>Qualifying Degrees</b>                              | <b>Career Stage</b>                                     |
|------------------|------------------------------------------------------------------------------------------------------------------------------------------------------------------|---------------------------------------------|----------------------|--------------------------------------------------------|---------------------------------------------------------|
| K23              | Supports the career development of clinical professionals to conduct mentored patient-oriented cancer research projects                                          | Clinical science, patient-oriented research | Up to 5 years        | MD or equivalent, PhD with clinical certification      | Non-tenured early career faculty with a clinical degree |
| K25              | Supports the career development of investigators with backgrounds in quantitative and engineering sciences to focus on behavioral and biomedical cancer research | All cancer research                         | Up to 5 years        | Advanced degree in quantitative science or engineering | Postdoctoral to senior faculty quantitative scientists  |

**Online Resource 2. Approximate as-of dates for data sources.**

| <b>Data Source</b>                         | <b>Approximate Data As-Of Date</b> |
|--------------------------------------------|------------------------------------|
| IMPAC II                                   | 4/28/2011                          |
| DRF                                        | Maximum PhD year is 2006           |
| AAMC Faculty Roster                        | 4/1/2010                           |
| ClinicalTrials.gov                         | 7/6/2011                           |
| Thomson Reuters ScienceWire - DoE          | 10/28/2010                         |
| Thomson Reuters ScienceWire - NSF          | 3/15/2011                          |
| MEDLINE                                    | 5/13/2011                          |
| HealthLink/Lodestone                       | 4/11/2011                          |
| International Cancer Research Partnership* | 3/15/2011                          |
| FASEB*                                     | 10/7/2010                          |
| AACR*                                      | 2/14/2011                          |
| ASCO*                                      | 3/21/2011                          |
| NIH-NED                                    | 8/5/2008 <sup>^</sup>              |
| FIDO.gov                                   | 4/11/2011 <sup>#</sup>             |

\*Indicates the date data were received by Discovery Logic/Thomson Reuters. K applicants who were currently registered members of FASEB, AACR, or ASCO were included in the match.

<sup>^</sup>Data downloaded for full cohort in feasibility study.

<sup>#</sup>Data download date; FIDO site listed data present through 2008.

### **Online Resource 3. Publication matching rules.**

1. Match publications for which there was an exact match of the MEDLINE author email address and the IMPAC II PI email address, and a moderate-strength “fuzzy” name match between the MEDLINE author name and the IMPAC II PI name. “Fuzzy” matching accommodates for misspellings and other variations.
2. Match publications for which there was an exact match of the MEDLINE author email address and the IMPAC II PI email address, and a name match between any of the other MEDLINE author names and the IMPAC II PI name.
3. Match publications for which there was an exact match of the Web of Science author email address (for MEDLINE publications that have been matched to Web of Science) and the IMPAC II PI email address, and a moderate-strength fuzzy name match between the MEDLINE author and the IMPAC II PI name.
4. Using the set of matches found using the first three rules and also publications found by funding acknowledgment (which are omitted from the overall match set if not also matched through one rules 1 – 3 to reduce a potential recall bias favoring awardees), find additional publications for which the MEDLINE author names have high name-frequency-corrected overlap and a fuzzy name match between the MEDLINE author name and the IMPAC II PI name.

**Online Resource 4. Demographic composition of the full and comparison cohorts.**

| Parameter                | Category                            | Full Cohort - Applicants (n = 2,893) | % Full Cohort | Comparison Cohort – Applicants (n = 586) | % Comparison Cohort |
|--------------------------|-------------------------------------|--------------------------------------|---------------|------------------------------------------|---------------------|
| Primary K Mechanism      | K01                                 | 479                                  | 16.1%         | 100                                      | 17.1%               |
|                          | K07                                 | 562                                  | 18.8%         | 82                                       | 14.0%               |
|                          | K08                                 | 1,176                                | 39.4%         | 284                                      | 48.5%               |
|                          | K11                                 | 166                                  | 5.6%          | 20                                       | 3.4%                |
|                          | K22                                 | 200                                  | 6.7%          | 42                                       | 7.2%                |
|                          | K23                                 | 254                                  | 8.5%          | 50                                       | 8.5%                |
|                          | K25                                 | 56                                   | 1.9%          | 8                                        | 1.4%                |
| Degree Type <sup>s</sup> | PhD                                 | 869                                  | 29.1%         | 160                                      | 27.3%               |
|                          | MD                                  | 1,209                                | 40.5%         | 245                                      | 41.8%               |
|                          | MD/PhD                              | 613                                  | 20.5%         | 157                                      | 26.8%               |
|                          | Dual                                | 43                                   | 1.4%          | 6                                        | 1.0%                |
|                          | Other                               | 40                                   | 1.3%          | 9                                        | 1.5%                |
|                          | Note                                | 4                                    | 0.1%          | 0                                        | 0.0%                |
|                          | Unknown                             | 115                                  | 3.9%          | 9                                        | 1.5%                |
| Gender                   | Male                                | 1,664                                | 57.5%         | 365                                      | 62.3%               |
|                          | Female                              | 1,055                                | 36.5%         | 204                                      | 34.8%               |
|                          | Unknown                             | 174                                  | 6.0%          | 17                                       | 2.9%                |
| Race/Ethnicity           | White                               | 1,519                                | 52.5%         | 313                                      | 53.4%               |
|                          | Hispanic                            | 49                                   | 1.7%          | 13                                       | 2.2%                |
|                          | Black                               | 42                                   | 1.5%          | 10                                       | 1.7%                |
|                          | Asian                               | 450                                  | 15.6%         | 97                                       | 16.6%               |
|                          | Native American                     | *                                    | *             | *                                        | *                   |
|                          | Other                               | 6                                    | 0.2%          | 4                                        | 0.7%                |
|                          | Unknown                             | 826                                  | 28.6%         | 149                                      | 25.4%               |
| Prior Support            | Had T Support                       | 1,020                                | 35.3%         | 247                                      | 42.2%               |
|                          | Had Only T Support                  | 806                                  | 27.9%         | 189                                      | 32.3%               |
|                          | Had F Support                       | 217                                  | 7.5%          | 47                                       | 8.0%                |
|                          | Had Only F Support                  | 112                                  | 3.9%          | 21                                       | 3.6%                |
|                          | Had L Support                       | 144                                  | 5.0%          | 30                                       | 5.1%                |
|                          | Had Only L Support                  | 53                                   | 1.8%          | 7                                        | 1.2%                |
|                          | Had RPG Support                     | 128                                  | 4.4%          | 25                                       | 4.3%                |
|                          | Had Only RPG Support                | 70                                   | 2.4%          | 11                                       | 1.9%                |
|                          | Had Multiple T, F, or L Support     | 165                                  | 5.7%          | 41                                       | 7.0%                |
|                          | Had Multiple Support, including RPG | 50                                   | 1.7%          | 12                                       | 2.0%                |

| Parameter                                       | Category                                   | Full Cohort - Applicants (n = 2,893) | % Full Cohort | Comparison Cohort – Applicants (n = 586) | % Comparison Cohort |
|-------------------------------------------------|--------------------------------------------|--------------------------------------|---------------|------------------------------------------|---------------------|
|                                                 | Had Only Other Support                     | 33                                   | 1.1%          | 8                                        | 1.4%                |
|                                                 | No Prior Support                           | 1,573                                | 54.4%         | 286                                      | 48.8%               |
| Institution Type (by applications) <sup>†</sup> | NCI-Designated Comprehensive Cancer Center | 2,539                                | 47.6%         | 343                                      | 48.4%               |
|                                                 | NCI-Designated Cancer Center               | 1,231                                | 23.1%         | 165                                      | 23.3%               |
|                                                 | Not an NCI-Designated Cancer Center        | 1,560                                | 29.3%         | 200                                      | 28.2%               |
| Average Age at Application <sup>#</sup>         |                                            | 37                                   | N/A           | 37                                       | N/A                 |
| Average Years Since Degree <sup>^</sup>         |                                            | 7.7                                  | N/A           | 7.9                                      | N/A                 |

<sup>§</sup>Dual degree refers to those holding a PhD or MD and an Other degree (e.g., DVM, DDS). Note degree is one not sufficient to qualify as a K applicant (e.g., BS, MS).

\*Indicates data have been suppressed due to a low number of applicants.

<sup>†</sup>Institution type data are for applications rather than individual applicants (n = 5,330 for full cohort; n = 708 for comparison cohort).

<sup>#</sup>Full cohort had age information available for 2,627 applicants; comparison cohort had age information for 551 applicants.

<sup>^</sup>Full cohort had years since degree information available for 2,330 applicants; comparison cohort had years since degree information for 508 applicants.
